# Association of *PCSK1* rs6234 with Obesity and Related Traits in a Chinese Han Population

Qibin Qi<sup>1</sup>, Huaixing Li<sup>1\*</sup>, Ruth J. F. Loos<sup>2</sup>, Chen Liu<sup>1</sup>, Frank B. Hu<sup>3</sup>, Hongyu Wu<sup>1</sup>, Zhijie Yu<sup>1</sup>, Xu Lin<sup>1\*</sup>

**1** Key Laboratory of Nutrition and Metabolism, Institute for Nutritional Sciences, Shanghai Institutes for Biological Sciences, Chinese Academy of Sciences and Graduate School of the Chinese Academy of Sciences, Shanghai, China, **2** MRC Epidemiology Unit, Institute of Metabolic Science, Addenbrooke's Hospital, Cambridge, United Kingdom, **3** Department of Nutrition, Harvard School of Public Health, Boston, Massachusetts, United States of America

## Abstract

**Background:** Common variants in *PCSK1* have been reported to be associated with obesity in populations of European origin. We aimed to replicate this association in Chinese.

**Methodology/Principal Findings:** Two *PCSK1* variants rs6234 and rs6235 (in strong LD with each other,  $r^2=0.98$ ) were genotyped in a population-based cohort of 3,210 Chinese Hans. The rs6234 was used for further association analyses with obesity and related traits. We found no significant association of rs6234 with obesity, overweight, BMI, waist circumference, or body fat percentage ( $P>0.05$ ) in all participants. However, the rs6234 G-allele showed a significant association with increased risk of combined phenotype of obesity and overweight (OR 1.21[1.03–1.43],  $P=0.0193$ ) and a trend toward association with obesity (OR 1.25[0.98–1.61],  $P=0.08$ ) in men, but not in women ( $P\geq 0.29$ ). Consistently, the rs6234 G-allele showed significant association with increased BMI ( $P=0.0043$ ), waist circumference ( $P=0.008$ ) and body fat percentage ( $P=0.0131$ ) only in men, not in women ( $P\geq 0.24$ ). Interestingly, the rs6234 G-allele was significantly associated with increased HOMA-B ( $P=0.0059$ ) and decreased HOMA-S ( $P=0.0349$ ) in all participants.

**Conclusion/Significance:** In this study, we found modest evidence for association of the *PCSK1* rs6234 with BMI and overweight in men only but not in women, which suggested that *PCSK1* rs6234 might not be an important contributor to obesity in Chinese Hans. However, further studies with larger sample sizes are needed to draw a firm conclusion.

**Citation:** Qi Q, Li H, Loos RJF, Liu C, Hu FB, et al. (2010) Association of *PCSK1* rs6234 with Obesity and Related Traits in a Chinese Han Population. PLoS ONE 5(5): e10590. doi:10.1371/journal.pone.0010590

**Editor:** Cuilin Zhang, National Institute of Child Health and Human Development/National Institutes of Health, United States of America

**Received:** January 7, 2010; **Accepted:** April 15, 2010; **Published:** May 17, 2010

**Copyright:** © 2010 Qi et al. This is an open-access article distributed under the terms of the Creative Commons Attribution License, which permits unrestricted use, distribution, and reproduction in any medium, provided the original author and source are credited.

**Funding:** This study was financially supported by the Chief Scientist Program of Shanghai Institutes for Biological Sciences, Chinese Academy of Sciences (SIBS2008006), the National Natural Science Foundation of China (30930081), the Ministry of Science and Technology of China (973 Program, Grant No. 2006CB503900; 863 Program, Grant No. 2007AA02Z332; and International Collaboration Program, Grant No. 2008DFA31960), and the Chinese Academy of Sciences (The Knowledge Innovation Program, Grant No. KSCX1-YW-02). The funders had no role in study design, data collection and analysis, decision to publish, or preparation of the manuscript.

**Competing Interests:** The authors have declared that no competing interests exist.

\* E-mail: lihx@sibs.ac.cn (HL); xlin@sibs.ac.cn (XL)

## Introduction

The *PCSK1* (prohormone convertase 1/3) gene encodes prohormone convertase 1/3 that converts inactive prohormones (including proinsulin, proglucagon and proopiomelanocortin) into biologically active peptide hormones. Loss-of-function mutations in *PCSK1* gene cause monogenic obesity and impaired glucose tolerance in human [1,2,3], implying that common variants in *PCSK1* might predispose to obesity and type 2 diabetes in the general population. Recently, the *PCSK1* nonsynonymous variants rs6232 (encoding N221D) and rs6234-rs6235 (encoding the Q665E-S690T pair) have been shown to be consistently associated with obesity risk (OR = 1.34 and 1.22, respectively) in European populations including a total of 13,659 individuals from eight independent case-control or family-based cohorts [4]. However, only a modest evidence for association between body mass index (BMI) and the *PCSK1* variant rs6232 ( $P=0.03$ ) was found in a meta-analysis of 15 genome-wide association studies (GWAS) for BMI with 32,387 individuals of European origin [5]. A subsequent study in 3,885 non-diabetic Swedes failed to confirm the association between the *PCSK1* rs6235 and obesity [6]. Similarly,

another recent study in 20,249 individuals of European descents from Norfolk, UK, also failed to replicate the association of the *PCSK1* rs6235 with obesity and related traits, and only found a suggestive evidence for association of the *PCSK1* rs6232 with obesity and BMI in younger individuals (age <59 yrs) but not in older age group [7]. Due to the inconsistent results, further replication studies are essential to confirm the association between genetic variation in *PCSK1* and obesity, particularly in other ethnic populations. In this study, we aimed to examine whether the previously reported association of the *PCSK1* genetic variants with obesity and related traits could be replicated in a population-based cohort of Chinese Hans including 3,210 unrelated individuals from Beijing and Shanghai.

## Materials and Methods

### Study population

The study sample consisted of 3,210 individuals (1,423 men and 1,787 women) from the Study on Nutrition and Health of Aging Population in China, a population-based study among non-institutionalized and unrelated Chinese Hans aged 50 to 70 years

**Table 1.** Characteristics of the study population.

|                                      | Men               | Women             | All               |
|--------------------------------------|-------------------|-------------------|-------------------|
| N (%)                                | 1,423 (44.3)      | 1,787 (55.7)      | 3,210             |
| Age (year)                           | 58.8±5.9          | 58.4±6.1          | 58.6±6.0          |
| BMI (kg/m <sup>2</sup> )             | 24.0 (21.8–26.3)  | 24.5 (22.1–26.9)  | 24.2 (22.0–26.6)  |
| Waist circumference (cm)             | 85.6 (78.0–92.7)  | 81.7 (74.9–89.0)  | 83.5 (76.0–90.8)  |
| Body fat percentage (%) <sup>a</sup> | 20.4±5.4          | 32.5±5.3          | 27.5±8.0          |
| Fasting glucose (mmol/L)             | 5.95±1.89         | 5.74±1.59         | 5.8±1.74          |
| Fasting insulin (pmol/L)             | 74.4 (52.8–102.0) | 88.2 (64.8–119.4) | 82.2 (59.4–112.2) |
| HOMA-B (%)                           | 101.6±45.6        | 117.2±46.9        | 110.3±47.0        |
| HOMA-S (%)                           | 69.5 (51.1–96.6)  | 59.3 (44.6–81.1)  | 63.6 (47.1–86.9)  |
| Overweight (%)                       | 531 (37.3)        | 693 (38.7)        | 1224 (38.1)       |
| Obese (%)                            | 177 (12.4)        | 297 (16.6)        | 474 (14.8)        |
| IFG (%)                              | 425 (29.9)        | 453 (25.4)        | 878 (27.4)        |
| Type 2 diabetes (%)                  | 207 (14.6)        | 217 (12.1)        | 424 (13.2)        |

Data are n (%), means±SD or medians (interquartile range).

BMI, body mass index; HOMA-B, homeostasis model assessment of pancreatic beta-cell function; HOMA-S, homeostasis model assessment of insulin sensitivity; IFG, impaired fasting glucose.

<sup>a</sup>Body fat percentage (%) was assessed using the dual-energy X-ray absorptiometry (DEXA) among 1,634 participants (711 men and 923 women) from Shanghai.

doi:10.1371/journal.pone.0010590.t001

from Beijing and Shanghai. The study population, design and protocols have been described in detail elsewhere [8]. Height, weight, waist circumference and body fat percentage, as well as fasting glucose and insulin were measured following standard protocols as described previously [8]. Homeostasis model assessment of pancreatic beta-cell function (HOMA-B) and insulin sensitivity (HOMA-S), as measures of beta-cell function and insulin sensitivity, respectively, were estimated by the homeostasis model using Levy's computer model [9]. Normal weight, overweight and obesity were defined as BMI <24, 24≤ BMI ≤28 and BMI ≥28 kg/m<sup>2</sup>, respectively, according to the Chinese criteria [10]. The study was approved by the Institutional Review Board of the Institute for Nutritional Sciences, Shanghai, China,

with written informed consent from all participants. The phenotypic characteristics of the population are shown in Table 1.

## Genotyping

Genomic DNA was extracted from peripheral blood leukocytes by salting out procedure (<http://www.protocol-online.org/prot/Detailed/3171.html>). Single nucleotide polymorphism (SNP) genotyping was performed with TaqMan SNP allelic discrimination by the ABI PRISM 7900HT Sequence Detection System (Applied Biosystems) according to the manufacturer's protocol. Since the *PCSK1* rs6232 is largely monomorphic in Chinese (minor allele frequency [MAF] = 0.01 and 0 for HapMap-CHB sample and AFD\_CHN\_PANEL, respectively), only the rs6234 and rs6235 were successfully genotyped in this study. The genotyping success rates of the rs6234 and rs6235 were 98.5% and 98.3%, respectively, and the concordance rates were both >99.5% based on 12% duplicate samples (n = 384). The allele frequencies of both SNPs (MAF = 0.330 and 0.328 for rs6234 and rs6235 in current sample, respectively) were comparable to those in the HapMap HCB database, and in Hardy-Weinberg equilibrium ( $P>0.54$ ). Since these 2 SNPs were in almost complete linkage disequilibrium (LD) ( $r^2 = 0.98$  in this population and  $r^2 = 1$  in HapMap-CHB population), only the rs6234 was selected for further association analyses as it had a higher genotyping success rate.

## Statistical analysis

The association between the rs6234 and risk of overweight, obesity and type 2 diabetes was tested by logistic regression under an additive model, adjusting for age, gender, geographical region (Shanghai/Beijing) and BMI (where appropriate). Generalized linear regression was applied to test for association between the rs6234 and quantitative traits in which participants with known diabetes or receiving glucose-lowering treatment (n = 267) were excluded. BMI, waist circumference, insulin and HOMA-S were natural log-transformed before analyses. Since the SNP distribution was not different between geographical regions ( $P>0.88$ ), we pooled all 3,210 individuals for the association studies. SNP-gender and SNP-age (<60 yrs, and >60 yrs) interactions were assessed by including the respective interaction term in the regression models. LD was estimated using Haploview V3.2 (<http://www.broad.mit.edu/mpg/haploview>). All reported *P*-values are nominal and two-sided. Association analyses were performed with SAS version 9.1 (SAS Institute, Cary, North

**Table 2.** Case-control analyses of *PCSK1* rs6234 with obesity and overweight.

|                          | Major/minor allele | Obesity vs. Normal |            |                  |          | Obesity and overweight vs. Normal |            |                  |          |
|--------------------------|--------------------|--------------------|------------|------------------|----------|-----------------------------------|------------|------------------|----------|
|                          |                    | n/MAF              |            | OR (95% CI)      | <i>P</i> | n/MAF                             |            | OR (95% CI)      | <i>P</i> |
|                          |                    | Cases              | Controls   |                  |          | Cases                             | Controls   |                  |          |
| All                      | C/G                | 471/0.321          | 1489/0.319 | 1.02 (0.86–1.19) | 0.86     | 1674/0.339                        | 1489/0.319 | 1.10 (0.98–1.22) | 0.10     |
| Men                      |                    | 176/0.366          | 703/0.312  | 1.25 (0.98–1.61) | 0.08     | 696/0.360                         | 703/0.312  | 1.21 (1.03–1.43) | 0.0196   |
| Women                    |                    | 295/0.293          | 786/0.324  | 0.89 (0.72–1.10) | 0.29     | 978/0.324                         | 786/0.324  | 1.02 (0.88–1.18) | 0.82     |
| <i>P</i> for interaction |                    |                    |            |                  | 0.0458   |                                   |            |                  | 0.11     |

The ORs are odds ratios that represent the effects of risk allele (G-allele) based on an additive model, in which individuals homozygous for CC were coded as 0, heterozygous individuals CG were coded as 1, and individuals homozygous for GG were coded as 2; The ORs and *P* values were adjusted for age, region and sex (where appropriate).

MAF, minor allele frequency.

doi:10.1371/journal.pone.0010590.t002

Carolina). Power calculations were performed using the Quanto software (<http://hydra.usc.edu/gxe/>).

## Results

We found no significant association between *PCSK1* rs6234 risk G-allele and obesity or overweight among all participants ( $P \geq 0.10$ ) (Table 2). However, the *PCSK1* rs6234 G-allele showed a significant association with increased risk of combined phenotype of obesity and overweight (OR 1.21 [1.03–1.43],  $P = 0.0193$ ) ( $P$  for SNP-gender interaction = 0.11) and a trend toward association with increased obesity risk (OR 1.25 [0.98–1.61],  $P = 0.08$ ) ( $P$  for SNP-gender interaction = 0.0458) in men, but not in women ( $P \geq 0.29$ ) in the gender-stratified analyses (Table 2). Consistently, the rs6234 G-allele was significantly associated with increased BMI ( $P = 0.0043$ ) ( $P$  for SNP-gender interaction = 0.0045), waist circumference ( $P = 0.008$ ) ( $P$  for SNP-gender interaction = 0.0055) and body fat percentage ( $P = 0.0131$ ) ( $P$  for SNP-gender interaction = 0.08) only in men, whereas no associations were observed in women ( $P \geq 0.24$ ). Our study had only 72.5% power to detect OR = 1.22 for obesity, as previously reported by the original study [4], at a significance of 5% and a MAF  $\geq 34\%$ . We, therefore, cannot rule out the possibility of false negative findings in women. In addition, no SNP-age interactions on risk of obesity or overweight or related traits were observed.

We observed no association with the risk of type 2 diabetes or combined type 2 diabetes/IFG either in all individuals or in men and women separately ( $P > 0.50$ ) (data not shown). In quantitative traits analyses, the rs6234 G-allele was significantly associated with increased HOMA-B ( $P = 0.0059$ ) and decreased HOMA-S ( $P = 0.0349$ ), but not with fasting glucose ( $P = 0.93$ ). No SNP-gender interactions ( $P \geq 0.16$ ) were observed (Table 3).

## Discussion

In this population-based sample of Chinese Hans, we did not replicate the association between the *PCSK1* rs6234-rs6235 pair and obesity risk previously reported by original study in European populations [4]. This is consistent with findings of several recent studies including 2 independent GWAS in White Europeans, in which no association was found between the *PCSK1* rs6235 and obesity or BMI [5,6,7,11]. Interestingly, we found that the *PCSK1* rs6234 risk G-allele was marginally associated with obesity and significantly associated with combined obesity/overweight in men, but not in women when the analyses were stratified by gender. Consistently, the same risk allele was also significantly associated with increased BMI and waist circumference in men in the quantitative trait analyses, but not in women, with significant SNP-gender interactions on BMI ( $P$  for interaction = 0.0045) and waist circumference ( $P$  for interaction = 0.0055). This is the first study to report the significant SNP-gender interactions of the *PCSK1* rs6234 on obesity related traits in Chinese Hans. We therefore choose to report all the results for men and women separately to highlight all potentially useful associations for subsequent studies. However, two previous replication studies in populations of European origin did not find any SNP-gender interaction of the *PCSK1* rs6235 on obesity risk [6,7]. Moreover, a more recent study in 1,094 subjects of Chinese origin has suggested that a common variant (rs155791) in strong LD with the rs6235 and rs6234, and two common haplotypes were all associated with obesity [12]. Lack of replication of the previously reported association in women could be because of limited power of this current study. Nevertheless, further studies with larger sample sizes would be required to provide definite evidence for the association between common variants in *PCSK1* and obesity in Chinese Hans.

**Table 3.** Quantitative traits analyses of *PCSK1* rs6234 with obesity related traits.

| PCSK1 rs6234                           |            |            |            |        |                   |  |
|----------------------------------------|------------|------------|------------|--------|-------------------|--|
|                                        | CC         | CG         | GG         | P      | P for interaction |  |
| BMI (kg/m <sup>2</sup> ) <sup>ab</sup> |            |            |            |        |                   |  |
| All                                    | 24.0 (0.1) | 24.1 (0.1) | 24.2 (0.2) | 0.45   | 0.0045            |  |
| Men                                    | 23.5 (0.1) | 23.9 (0.1) | 24.3 (0.3) | 0.0043 |                   |  |
| Women                                  | 24.5 (0.1) | 24.4 (0.1) | 24.1 (0.3) | 0.26   |                   |  |
| Waist circumference (cm) <sup>ab</sup> |            |            |            |        |                   |  |
| All                                    | 82.8 (0.3) | 83.1 (0.3) | 83.2 (0.6) | 0.49   | 0.0055            |  |
| Men                                    | 83.8 (0.4) | 85.9 (0.4) | 86.8 (0.8) | 0.008  |                   |  |
| Women                                  | 81.5 (0.4) | 81.3 (0.4) | 80.6 (0.8) | 0.24   |                   |  |
| Body fat percentage (%) <sup>b</sup>   |            |            |            |        |                   |  |
| All                                    | 26.0±0.2   | 26.7±0.3   | 26.7±0.5   | 0.06   | 0.08              |  |
| Men                                    | 19.7±0.4   | 20.8±0.4   | 21.5±0.8   | 0.0131 |                   |  |
| Women                                  | 32.3±0.3   | 32.7±0.3   | 32.2±0.6   | 0.72   |                   |  |
| Glucose (mmol/L) <sup>c</sup>          |            |            |            |        |                   |  |
| All                                    | 5.57±0.03  | 5.62±0.03  | 5.53±0.07  | 0.93   | 0.79              |  |
| Men                                    | 5.62±0.05  | 5.68±0.05  | 5.59±0.11  | 0.83   |                   |  |
| Women                                  | 5.52±0.04  | 5.56±0.04  | 5.47±0.09  | 0.93   |                   |  |
| Insulin (pmol/L) <sup>ac</sup>         |            |            |            |        |                   |  |
| All                                    | 77.9 (1.1) | 81.8 (1.1) | 79.0 (2.2) | 0.09   | 0.31              |  |
| Men                                    | 71.5 (1.5) | 73.7 (1.5) | 70.4 (3.1) | 0.83   |                   |  |
| Women                                  | 83.2 (1.4) | 89.1 (1.6) | 86.1 (3.1) | 0.0441 |                   |  |
| HOMA-B (%) <sup>c</sup>                |            |            |            |        |                   |  |
| All                                    | 111.1±1.2  | 114.4±1.2  | 117.6±2.5  | 0.0059 | 0.16              |  |
| Men                                    | 105.5±1.8  | 105.5±1.8  | 109.9±3.7  | 0.43   |                   |  |
| Women                                  | 116.9±1.6  | 122.8±1.6  | 125.2±3.3  | 0.0032 |                   |  |
| HOMA-S (%) <sup>ac</sup>               |            |            |            |        |                   |  |
| All                                    | 67.6 (0.9) | 64.4 (0.8) | 65.6 (1.8) | 0.0349 | 0.61              |  |
| Men                                    | 72.5 (1.5) | 71.0 (1.4) | 70.0 (2.9) | 0.37   |                   |  |
| Women                                  | 63.9 (1.1) | 59.4 (1.0) | 62.4 (2.2) | 0.0492 |                   |  |

Data are means±SE or geometric means (SE) unless otherwise indicated; Participants previously diagnosed type 2 diabetes or receiving anti-glucose treatment (n=267) were excluded from the analyses.

BMI, body mass index; HOMA-B, homeostasis model assessment of pancreatic beta-cell function; HOMA-S, homeostasis model assessment of insulin sensitivity.

<sup>a</sup>These variables were log-transformed before analyses.

<sup>b</sup>Adjusted for age, region and sex (where appropriate).

<sup>c</sup>Adjusted for age, region, BMI and sex (where appropriate).

doi:10.1371/journal.pone.0010590.t003

Another interesting finding of the present study is that the *PCSK1* rs6234 G-allele was significantly associated with decreased insulin sensitivity and increased beta-cell function estimated by HOMA-S and HOMA-B, respectively. The underlying mechanism remained to be investigated. Consistently, the recent study in a Chinese population has also found a suggestive evidence for association between the *PCSK1* rs6235 and increased HOMA-IR values ( $P = 0.02$ ) [12]. The compensatory adaptation of pancreatic beta-cells to insulin resistance might lead to increased HOMA-B. However, more studies are warranted to confirm this hypothesis.

In conclusion, in this population-based cohort of Chinese Hans, we found modest evidence for association of the *PCSK1* variant rs6234 with BMI and overweight in men only, but not in women.

Further studies with larger sample sizes are warranted to confirm the association between common variants in *PCSK1* and obesity risk in Chinese Hans, especially in women.

## Acknowledgments

We are grateful to all participants of the Nutrition and Health of Aging Population in China. We also thank Drs. Xinghuo Pang, Zhen Zhang, Shufang Jiao, Hong Liu, Shurong Zou, and all other researchers and the healthcare professionals from the Centers for Disease Control and Prevention in Beijing and in Shanghai taking part in the fieldwork of

this study and our colleagues Xingwang Ye, Lihua Chen, An Pan, Liang Sun, Ling Lu, Shaojie Ma, and He Zheng for their kind help at various stages of this study.

## Author Contributions

Conceived and designed the experiments: QQ HL FBH ZY XL. Performed the experiments: QQ CL HW. Analyzed the data: QQ. Contributed reagents/materials/analysis tools: RJFL ZY. Wrote the paper: QQ HL RJFL.

## References

1. Jackson RS, Creemers JWM, Ohagi S, Raffin-Sanson M-L, Sanders L, et al. (1997) Obesity and impaired prohormone processing associated with mutations in the human prohormone convertase 1 gene. *Nat Genet* 16: 303–306.
2. Jackson RS, Creemers JW, Farooqi IS, Raffin-Sanson ML, Varro A, et al. (2003) Small-intestinal dysfunction accompanies the complex endocrinopathy of human proprotein convertase 1 deficiency. *J Clin Invest* 112: 1550–1560.
3. Farooqi IS, Volders K, Stanhope R, Heuschkel R, White A, et al. (2007) Hyperphagia and early-onset obesity due to a novel homozygous missense mutation in prohormone convertase 1/3. *J Clin Endocrinol Metab* 92: 3369–3373.
4. Benzinou M, Creemers JW, Choquet H, Lobbens S, Dina C, et al. (2008) Common nonsynonymous variants in *PCSK1* confer risk of obesity. *Nat Genet* 40: 943–945.
5. Willer CJ, Speliotes EK, Loos RJ, Li S, Lindgren CM, et al. (2009) Six new loci associated with body mass index highlight a neuronal influence on body weight regulation. *Nat Genet* 41: 25–34.
6. Renstrom F, Payne F, Nordstrom A, Brito EC, Rolandsson O, et al. (2009) Replication and extension of genome-wide association study results for obesity in 4923 adults from northern Sweden. *Hum Mol Genet* 18: 1489–1496.
7. Kilpelainen TO, Bingham SA, Khaw K-T, Wareham NJ, Loos RJ (2009) Association of variants in the *PCSK1* gene with obesity in the EPIC-Norfolk study. *Hum Mol Genet* 18: 3496–3501.
8. Li H, Wu Y, Loos RJ, Hu FB, Liu Y, et al. (2008) Variants in the fat mass- and obesity-associated (*FTO*) gene are not associated with obesity in a Chinese Han population. *Diabetes* 57: 264–268.
9. Levy JC, Matthews DR, Hermans MP (1998) Correct homeostasis model assessment (HOMA) evaluation uses the computer program. *Diabetes Care* 21: 2191–2192.
10. Zhou BF (2002) Predictive values of body mass index and waist circumference for risk factors of certain related diseases in Chinese adults—study on optimal cut-off points of body mass index and waist circumference in Chinese adults. *Biomed Environ Sci* 15: 83–96.
11. Thorleifsson G, Walters GB, Gudbjartsson DF, Steinthorsdottir V, Sulem P, et al. (2009) Genome-wide association yields new sequence variants at seven loci that associate with measures of obesity. *Nat Genet* 41: 18–24.
12. Chang Y-C, Chiu Y-F, Shih K-C, Lin M-W, Sheu WH-H, et al. (2009) Common *PCSK1* haplotypes are associated with obesity in the Chinese population. *Obesity* Oct 29 [Epub ahead of print]. doi:10.1038/oby.2009.390.
